# Supplementary material for: Beyond acid treatment of PEDOT:PSS: decoding mechanisms of electrical conductivity enhancement
Source: Royal Society of Chemistry journal article supplement (doi:10.1039/d4ma00078a), 2024-01-01
Supplement: d4ma00078a2.pdf [file d4ma00078a2.pdf]

## Supporting Information

### **Beyond Acid Treatment of PEDOT:PSS: Decoding Mechanisms of Electrical Conductivity Enhancement**

Hatef Yousefian<sup>a</sup>, Seyed Alireza Hashemi<sup>a</sup>, Amin Babaei-Ghazvini<sup>b</sup>, Bishnu Acharya<sup>b</sup>,  
Ahmadreza Ghaffarkhah<sup>a,\*</sup>, Mohammad Arjmand<sup>a,\*</sup>

*<sup>a</sup>Nanomaterials and Polymer Nanocomposites Laboratory, School of Engineering, University of British Columbia, Kelowna, BC, V1V 1V7, Canada*

*<sup>b</sup>Department of Chemical and Biological Engineering, University of Saskatchewan, 57 Campus Drive, Saskatoon, SK S7N 5A9, Canada*

Corresponding authors: [ah.ghaffarkhah@ubc.ca](mailto:ah.ghaffarkhah@ubc.ca), [mohammad.arjmand@ubc.ca](mailto:mohammad.arjmand@ubc.ca)

## 1. GIWAXS measurements

The average number of packed PEDOT chains in the nanocrystal, as described in the main manuscript, was calculated as follows:<sup>1</sup>

$$N_{avg} = \left( \frac{CCL_{q_{xy}}}{d} \times \frac{E\%}{E\% + F\%} \right) + \left( \frac{CCL_{q_z}}{d} \times \frac{F\%}{E\% + F\%} \right) \quad (S1)$$

where  $CCL_{q_{xy}}$  and  $CCL_{q_z}$  represent the in-plane and out-of-plane correlation length of the crystal,  $E\%$  and  $F\%$  represent edge-on and face-on fraction in the film, and  $d$  represents the  $\pi$ - $\pi$  distance of the packed PEDOT chains.

## 2. EMI shielding measurements and setup

EMI shielding characteristics of fabricated films were assessed within the X-band frequency range (8.2-12.4 GHz) using a vector network analyzer (VNA) (P9374A Keysight) equipped with a WR90 waveguide. The micrometer thick conductive PEDOT:PSS films were first attached to an offset short and sandwiched between waveguide adaptors. Thence, the samples were exposed to signals within the X-band frequency range, and the shielding parameters were calculated according to the complex scattering (S-) parameters.<sup>2</sup> By considering the complex S-parameters, the reflectance (R), transmittance (T), and absorbance (A) were measured via the following formulations:

$$R = S_{11}^2 \quad (S2)$$

$$T = S_{21}^2 \quad (S3)$$

$$A = 1 - R - T \quad (S4)$$

where  $S_{11}$  is the divided reflected voltage magnitude over the incident voltage magnitude in port  $S_1$ , whereas  $S_{21}$  is the transmitted voltage magnitude from port 1 to port 2 divided by the incident

voltage magnitude in port 1. Other shielding parameters, including EMI reflection loss ( $SE_R$ ) and absorption loss ( $SE_A$ ), were measured as follows:

$$SE_R = 10 \log \left( \frac{1}{1-R} \right) \quad (S5)$$

$$SE_A = 10 \log \left( \frac{1-R}{T} \right) \quad (S6)$$

The total EMI shielding effectiveness ( $SE_T$ ) is measured by the sum of  $SE_R$  and  $SE_A$ , i.e.,  $SE_T=SE_R+SE_A$ . The specific shielding effectiveness ( $SSE/t$ ) of shields was calculated by the following equation:

$$SSE/t = \frac{SE_T}{\rho * t} \quad (S7)$$

in which  $t$  is the thickness of the sample in cm, and  $\rho$  represents the density in  $\text{g.cm}^{-3}$ . This parameter considers the lightness and  $SE_T$  of a sample simultaneously, giving a critical insight into the practicality of the shield for weight-wise applications.

### 3. Figures

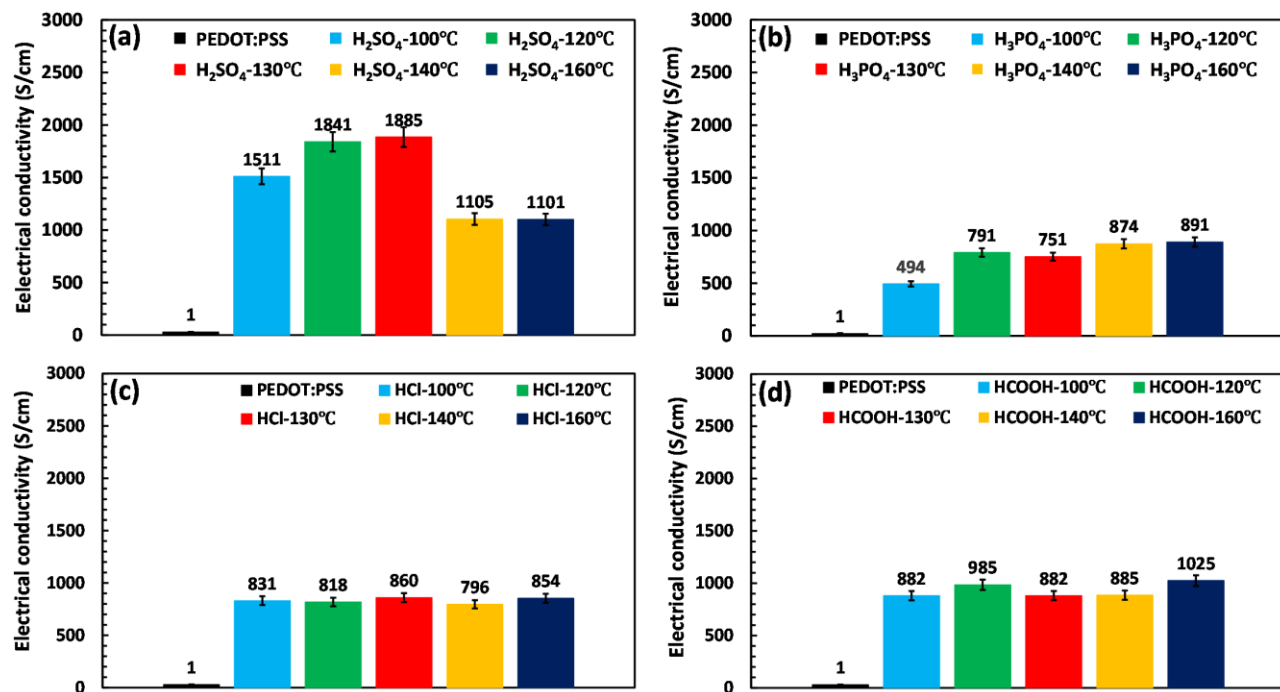

**Fig. S1** Electrical conductivity of PEDOT:PSS after a) H<sub>2</sub>SO<sub>4</sub>, b) H<sub>3</sub>PO<sub>4</sub>, c) HCl, and d) HCOOH post-treatment at different annealing temperatures.

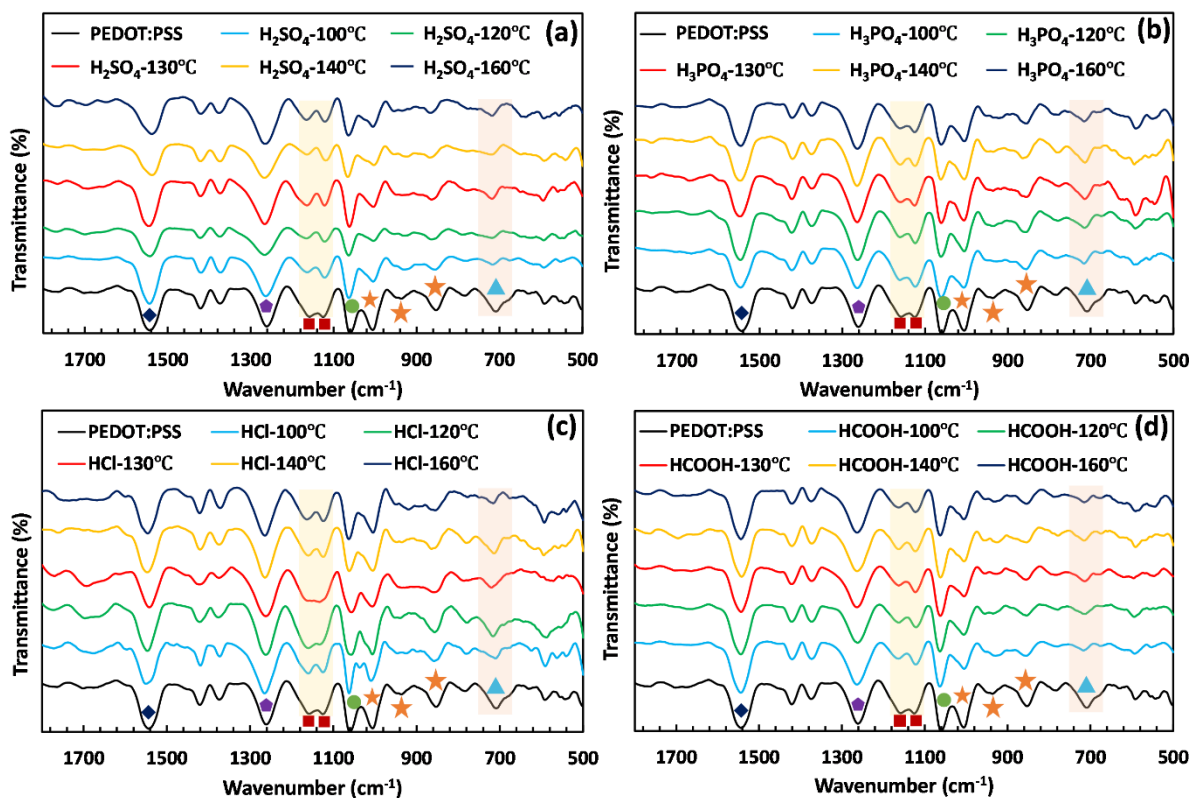

**Fig. S2** FTIR analysis of PEDOT:PSS treated at the different annealing temperatures with a)  $\text{H}_2\text{SO}_4$ , b)  $\text{H}_3\text{PO}_4$ , c) HCl, and d) HCOOH. The symbols in Fig. S2 represent the assigned peaks of FTIR analysis. The orange star, dark blue diamond, and purple hexagon are attributed to C-S, C-C and C=C bonds of PEDOT, respectively. The C-S bond, S-phenyl group, and symmetric/asymmetric stretching vibrations of  $\text{SO}_3^-$  groups of PSS are shown by the blue triangle, green circle, and red square, respectively.

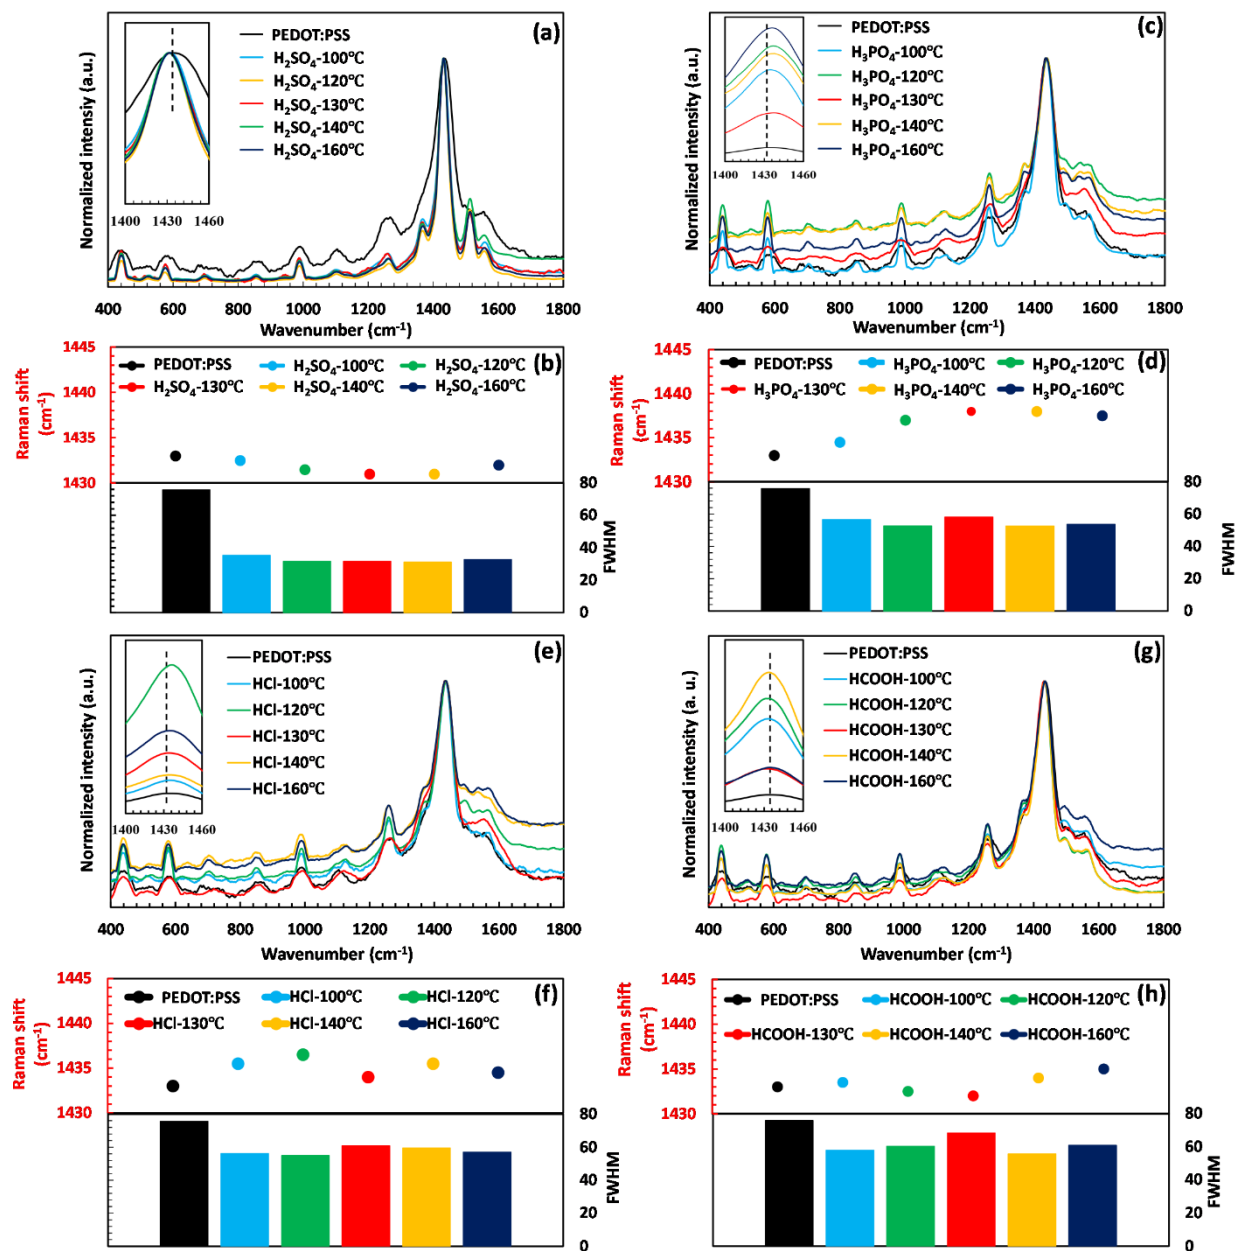

**Fig. S3** Raman analysis of PEDOT:PSS treated at different annealing temperatures with a-b) H<sub>2</sub>SO<sub>4</sub>, c-d) H<sub>3</sub>PO<sub>4</sub>, e-f) HCl, and g-h) HCOOH. It should be noted the Raman peak shift and FWHM values are attributed to the symmetric C<sub>α</sub> = C<sub>α</sub> peak.

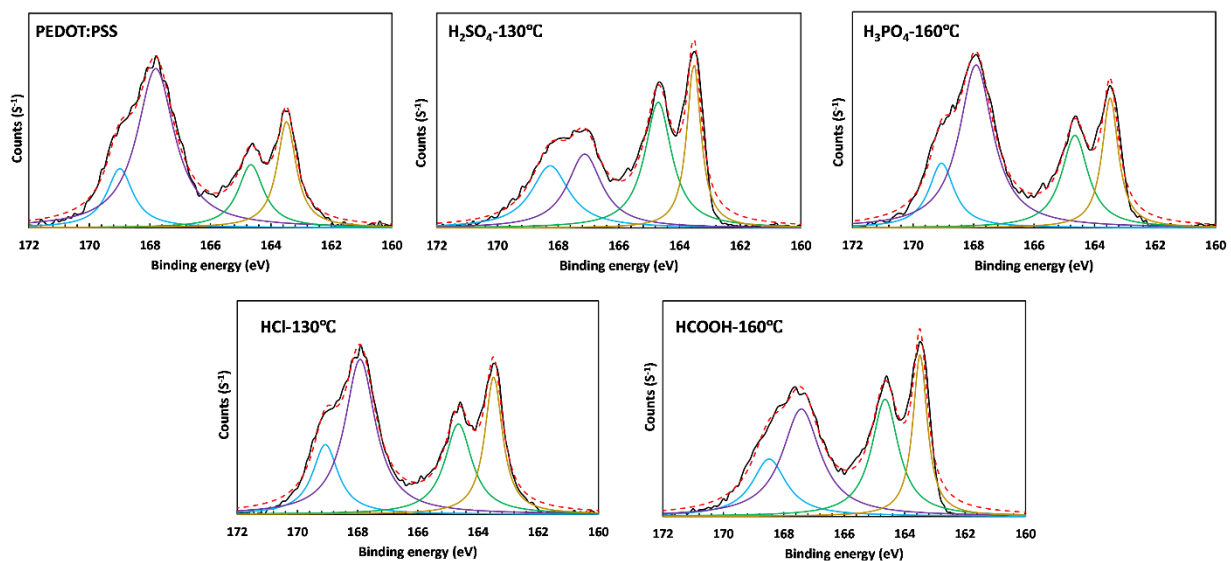

**Fig. S4** Deconvoluting the S<sub>2p</sub> XPS scan of pure and acid-treated PEDOT:PSS films using the Gaussian method.

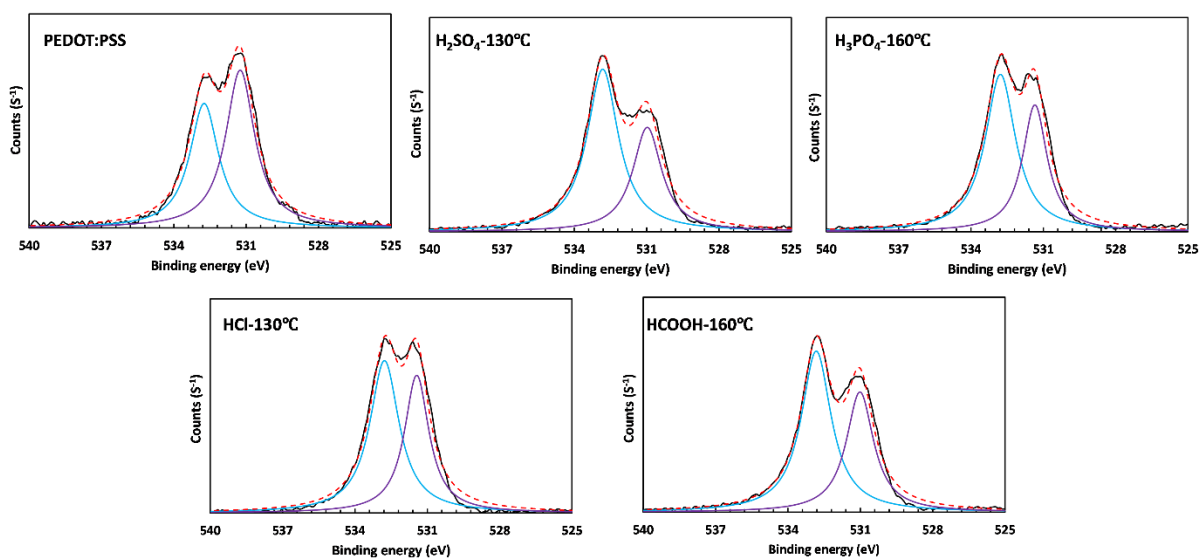

**Fig. S5** Deconvoluting the O<sub>1s</sub> XPS scan of pure and acid-treated PEDOT:PSS films using the Gaussian method.

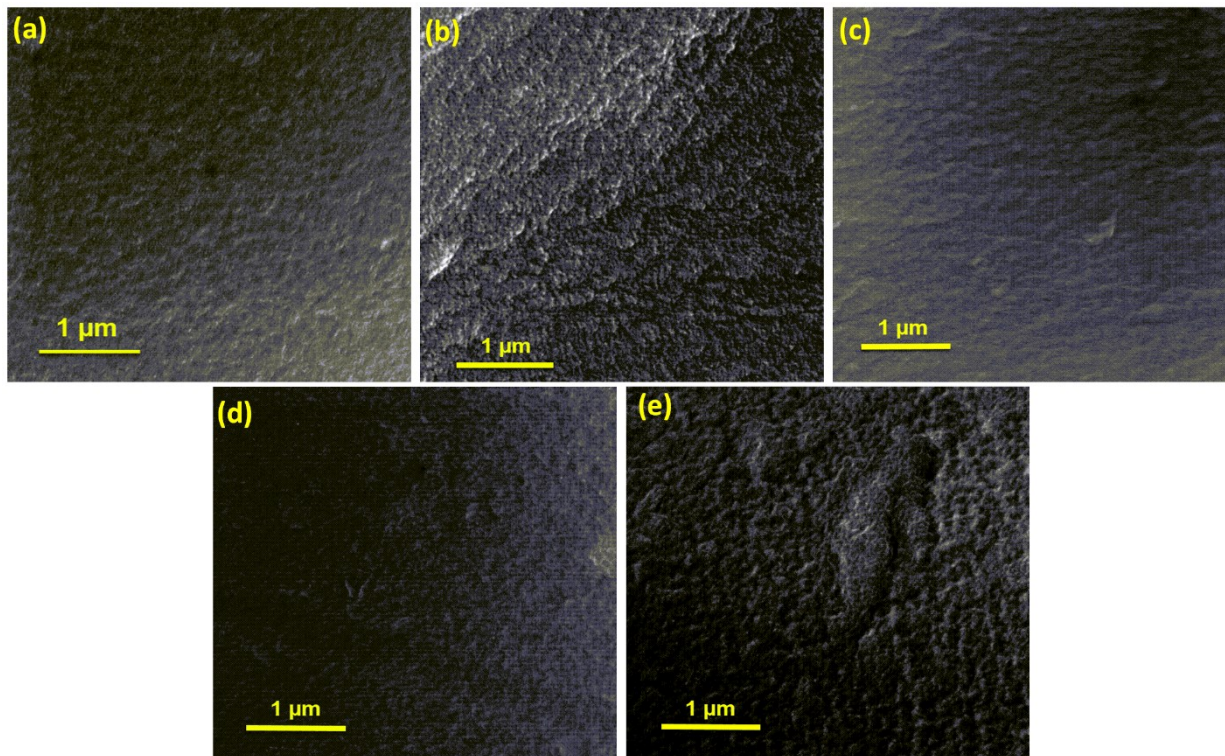

**Fig. S6** Surface FESEM images of a) pristine, b)  $\text{H}_2\text{SO}_4$ , c)  $\text{H}_3\text{PO}_4$ , d)  $\text{HCl}$ , and e)  $\text{HCOOH}$  treated PEDOT:PSS films.



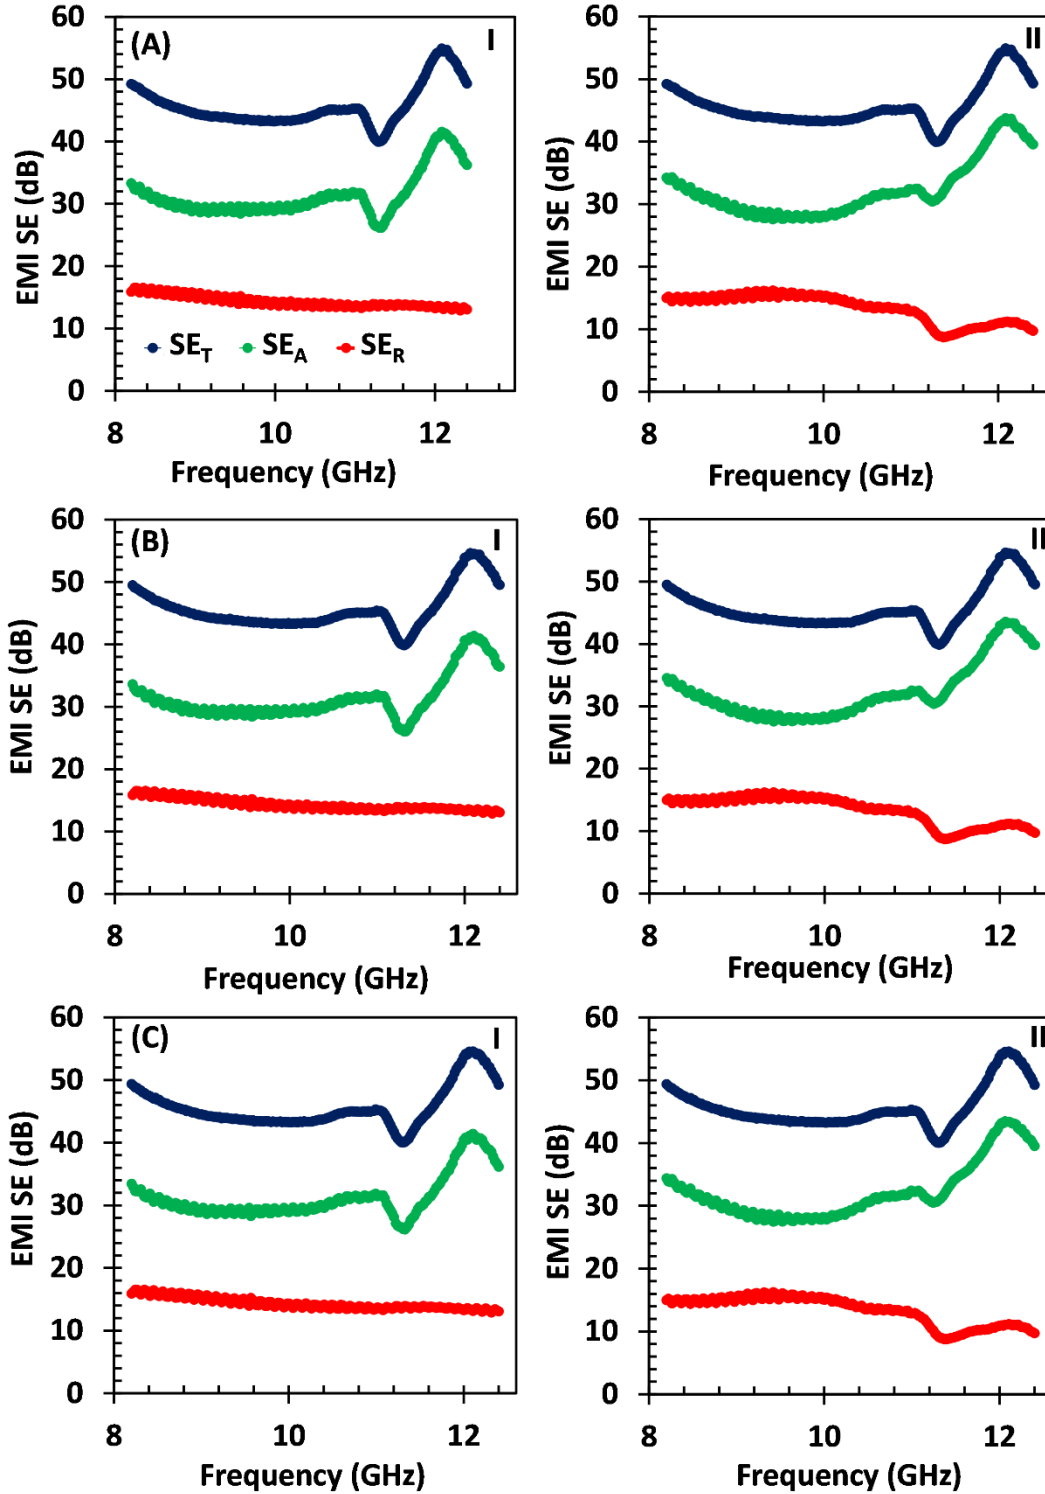

**Fig. S7 a-c** EMI shielding characteristics ( $SE_T$ ,  $SE_A$ ,  $SE_R$ ) of the  $H_2SO_4$ -treated PEDOT:PSS film. Each sample was tested three times to ensure repeatability. (I) and (II) refer to data collected from ports one and two of the VNA setup, respectively.

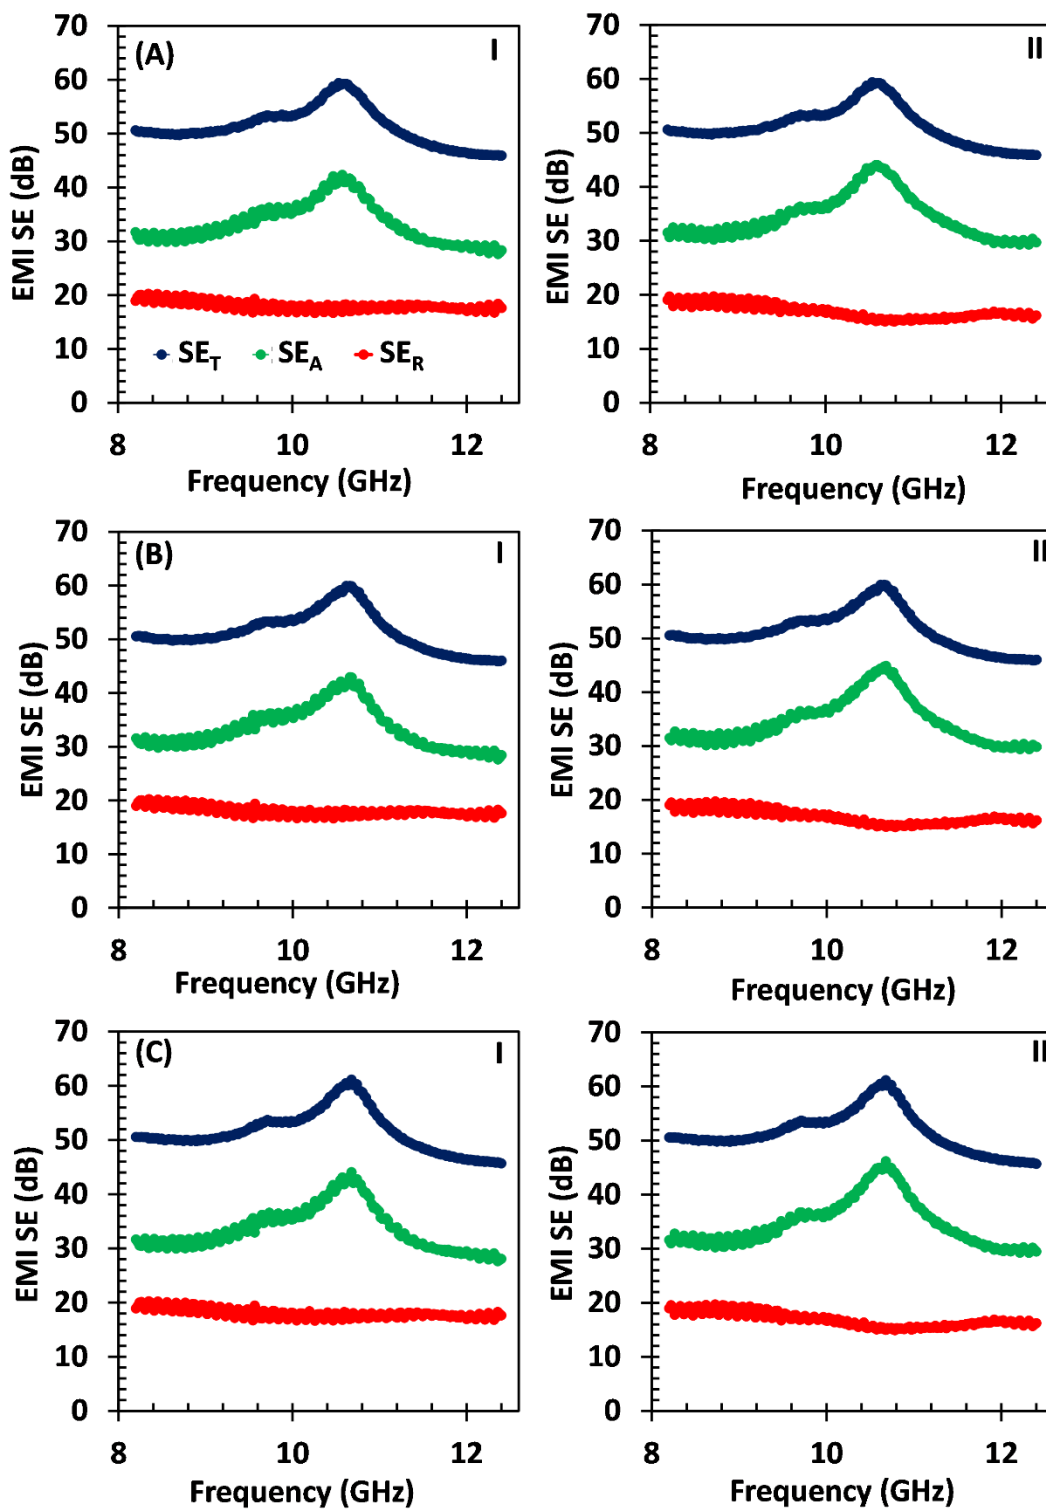

**Fig. S8** a-c) EMI shielding characteristics ( $SE_T$ ,  $SE_A$ ,  $SE_R$ ) of hot-pressed  $H_2SO_4$ -treated PEDOT:PSS film. Each sample was tested for three times to ensure repeatability. (I) and (II) refer to data collected from ports one and two of the VNA setup, respectively.

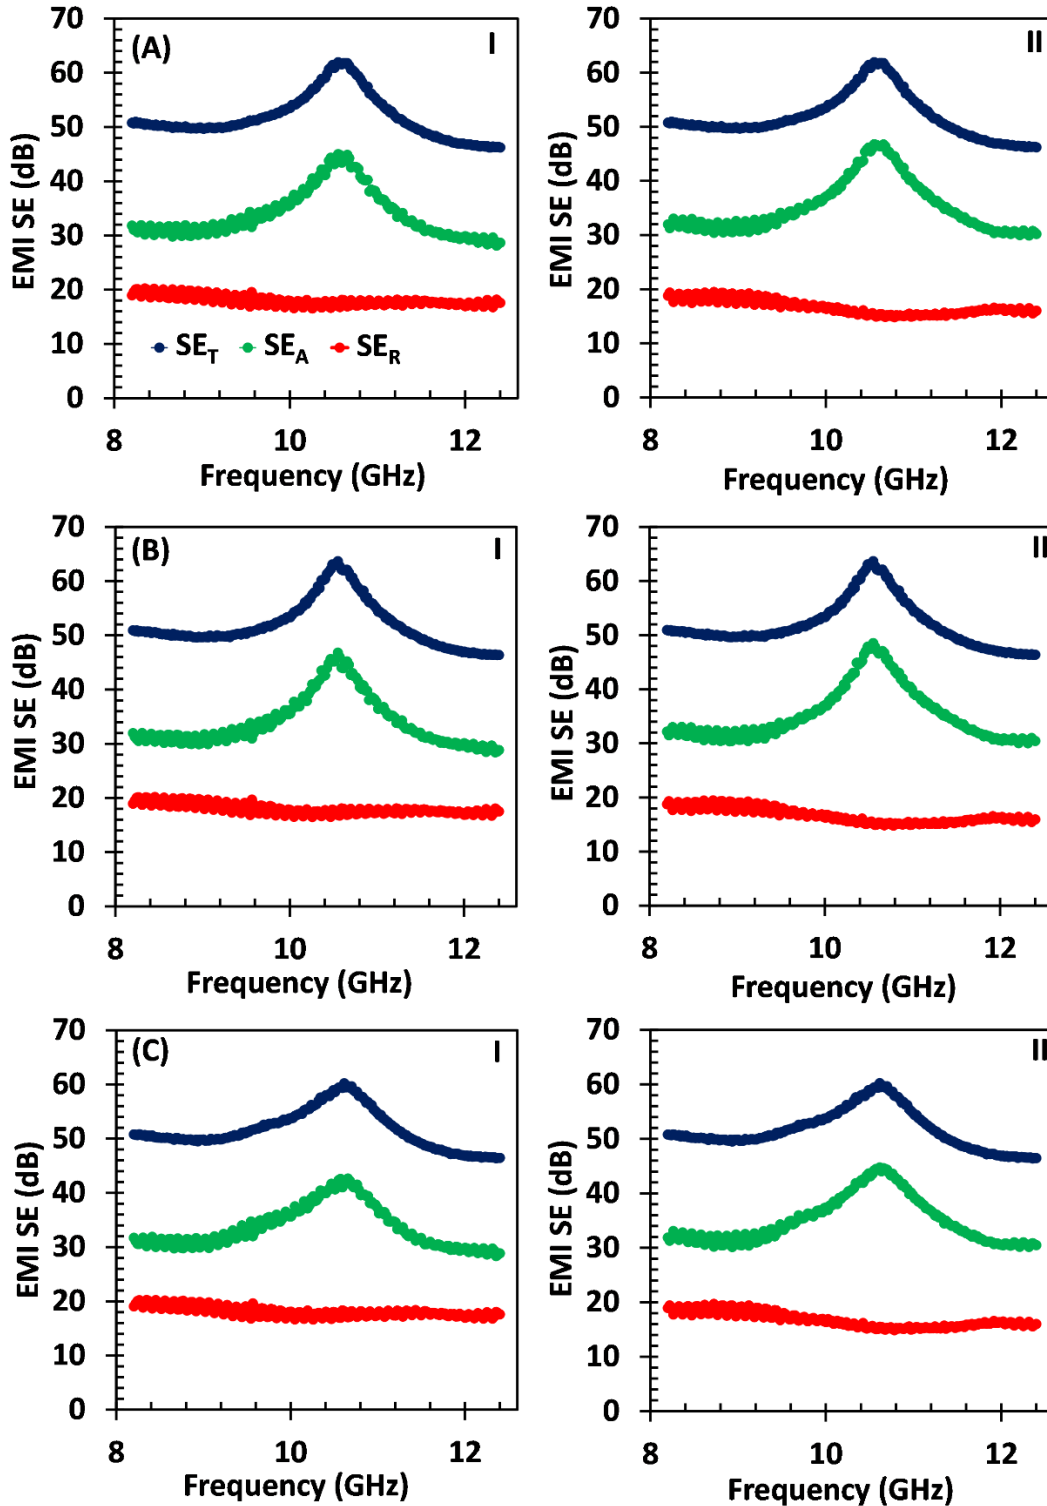

**Fig. S9** a-c) EMI shielding characteristics ( $SE_T$ ,  $SE_A$ ,  $SE_R$ ) of hot-pressed  $H_2SO_4$ -treated PEDOT:PSS film after 2000 bending cycles. Each sample was tested for three times to ensure repeatability. (I) and (II) refer to data collected from ports one and two of the VNA setup, respectively.

#### 4. Tables

**Table S1.** FTIR band assignment of pristine and H<sub>2</sub>SO<sub>4</sub> treated PEDOT:PSS film.

| Moieties                                      | Sulfuric acid post-treatment       |                                                                      |                                                                      |                                                                      |                                                                      |                                                                      |
|-----------------------------------------------|------------------------------------|----------------------------------------------------------------------|----------------------------------------------------------------------|----------------------------------------------------------------------|----------------------------------------------------------------------|----------------------------------------------------------------------|
|                                               | Pure PEDOT:PSS (cm <sup>-1</sup> ) | PEDOT:PSS /H <sub>2</sub> SO <sub>4</sub> -100°C (cm <sup>-1</sup> ) | PEDOT:PSS /H <sub>2</sub> SO <sub>4</sub> -120°C (cm <sup>-1</sup> ) | PEDOT:PSS /H <sub>2</sub> SO <sub>4</sub> -130°C (cm <sup>-1</sup> ) | PEDOT:PSS /H <sub>2</sub> SO <sub>4</sub> -140°C (cm <sup>-1</sup> ) | PEDOT:PSS /H <sub>2</sub> SO <sub>4</sub> -160°C (cm <sup>-1</sup> ) |
| <i>C – S</i>                                  | 709                                | 716                                                                  | 718                                                                  | 718                                                                  | 720                                                                  | 718                                                                  |
|                                               | 853                                | 867                                                                  | 864                                                                  | 864                                                                  | 868                                                                  | 866                                                                  |
|                                               | 937                                | 925                                                                  | 930                                                                  | 936                                                                  | 925                                                                  | 935                                                                  |
| <i>S – phenyl</i>                             | 1060                               | 1060                                                                 | 1064                                                                 | 1062                                                                 | 1066                                                                 | 1064                                                                 |
| <i>–SO<sub>3</sub><sup>-</sup> symmetric</i>  | 1125                               | 1121                                                                 | 1122                                                                 | 1122                                                                 | 1119                                                                 | 1121                                                                 |
| <i>–SO<sub>3</sub><sup>-</sup> asymmetric</i> | 1158                               | 1162                                                                 | 1165                                                                 | 1164                                                                 | 1164                                                                 | 1164                                                                 |
| <i>C – C</i>                                  | 1261                               | 1274                                                                 | 1266                                                                 | 1266                                                                 | 1267                                                                 | 1266                                                                 |
| <i>C = C</i>                                  | 1543                               | 1423                                                                 | 1543                                                                 | 1545                                                                 | 1538                                                                 | 1539                                                                 |

**Table S2.** FTIR band assignment of pristine and H<sub>3</sub>PO<sub>4</sub> treated PEDOT:PSS film.

| Moieties                                     | Phosphoric acid post-treatment     |                                                                      |                                                                      |                                                                      |                                                                      |                                                                      |
|----------------------------------------------|------------------------------------|----------------------------------------------------------------------|----------------------------------------------------------------------|----------------------------------------------------------------------|----------------------------------------------------------------------|----------------------------------------------------------------------|
|                                              | Pure PEDOT:PSS (cm <sup>-1</sup> ) | PEDOT:PSS /H <sub>3</sub> PO <sub>4</sub> -100°C (cm <sup>-1</sup> ) | PEDOT:PSS /H <sub>3</sub> PO <sub>4</sub> -120°C (cm <sup>-1</sup> ) | PEDOT:PSS /H <sub>3</sub> PO <sub>4</sub> -130°C (cm <sup>-1</sup> ) | PEDOT:PSS /H <sub>3</sub> PO <sub>4</sub> -140°C (cm <sup>-1</sup> ) | PEDOT:PSS /H <sub>3</sub> PO <sub>4</sub> -160°C (cm <sup>-1</sup> ) |
| <i>C – S</i>                                 | 709                                | 716                                                                  | 715                                                                  | 715                                                                  | 715                                                                  | 716                                                                  |
|                                              | 853                                | 856                                                                  | 857                                                                  | 856                                                                  | 846                                                                  | 855                                                                  |
|                                              | 937                                | 933                                                                  | 936                                                                  | 936                                                                  | 936                                                                  | 922                                                                  |
| <i>S – phenyl</i>                            | 1060                               | 1061                                                                 | 1062                                                                 | 1061                                                                 | 1062                                                                 | 1061                                                                 |
| <i>–SO<sub>3</sub><sup>-</sup> symmetric</i> | 1125                               | 1124                                                                 | 1124                                                                 | 1125                                                                 | 1124                                                                 | 1124                                                                 |
| <i>–SO<sub>3</sub><sup>-</sup> symmetric</i> | 1158                               | 1161                                                                 | 1161                                                                 | 1160                                                                 | 1160                                                                 | 1160                                                                 |
| <i>C – C</i>                                 | 1261                               | 1264                                                                 | 1263                                                                 | 1264                                                                 | 1264                                                                 | 1264                                                                 |
| <i>C = C</i>                                 | 1543                               | 1546                                                                 | 1546                                                                 | 1548                                                                 | 1547                                                                 | 1545                                                                 |

**Table S3.** FTIR band assignment of pristine and HCl treated PEDOT:PSS film.

| Moieties                                      | Hydrochloric acid post-treatment   |                                            |                                            |                                            |                                            |                                            |
|-----------------------------------------------|------------------------------------|--------------------------------------------|--------------------------------------------|--------------------------------------------|--------------------------------------------|--------------------------------------------|
|                                               | Pure PEDOT:PSS (cm <sup>-1</sup> ) | PEDOT:PSS /HCl - 100°C (cm <sup>-1</sup> ) | PEDOT:PSS /HCl - 120°C (cm <sup>-1</sup> ) | PEDOT:PSS /HCl - 130°C (cm <sup>-1</sup> ) | PEDOT:PSS /HCl - 140°C (cm <sup>-1</sup> ) | PEDOT:PSS /HCl - 160°C (cm <sup>-1</sup> ) |
| <i>C – S</i>                                  | 709                                | 716                                        | 717                                        | 720                                        | 715                                        | 716                                        |
|                                               | 853                                | 854                                        | 857                                        | 857                                        | 856                                        | 856                                        |
|                                               | 937                                | 935                                        | 940                                        | 928                                        | 927                                        | 920                                        |
| <i>S – phenyl</i>                             | 1060                               | 1061                                       | 1057                                       | 1057                                       | 1062                                       | 1063                                       |
| <i>–SO<sub>3</sub><sup>-</sup> symmetric</i>  | 1125                               | 1126                                       | 1134                                       | 1134                                       | 1124                                       | 1124                                       |
| <i>–SO<sub>3</sub><sup>-</sup> asymmetric</i> | 1158                               | 1163                                       | 1160                                       | 1161                                       | 1160                                       | 1163                                       |
| <i>C – C</i>                                  | 1261                               | 1265                                       | 1263                                       | 1262                                       | 1264                                       | 1265                                       |
| <i>C = C</i>                                  | 1543                               | 1546                                       | 1547                                       | 1542                                       | 1547                                       | 1546                                       |

**Table S4.** FTIR band assignment of pristine and HCOOH treated PEDOT:PSS film.

| Moisty                                        | Formic acid post-treatment         |                                             |                                              |                                              |                                              |                                              |
|-----------------------------------------------|------------------------------------|---------------------------------------------|----------------------------------------------|----------------------------------------------|----------------------------------------------|----------------------------------------------|
|                                               | Pure PEDOT:PSS (cm <sup>-1</sup> ) | PEDOT:PSS/HCOOH - 100°C (cm <sup>-1</sup> ) | PEDOT:PSS /HCOOH - 120°C (cm <sup>-1</sup> ) | PEDOT:PSS /HCOOH - 130°C (cm <sup>-1</sup> ) | PEDOT:PSS /HCOOH - 140°C (cm <sup>-1</sup> ) | PEDOT:PSS /HCOOH - 160°C (cm <sup>-1</sup> ) |
| <i>C - S</i>                                  | 709                                | 717                                         | 713                                          | 714                                          | 715                                          | 715                                          |
|                                               | 853                                | 855                                         | 854                                          | 855                                          | 854                                          | 854                                          |
|                                               | 937                                | 929                                         | 935                                          | 927                                          | 926                                          | 932                                          |
| <i>S - phenyl</i>                             | 1060                               | 1063                                        | 1063                                         | 1063                                         | 1062                                         | 1063                                         |
| <i>-SO<sub>3</sub><sup>-</sup> symmetric</i>  | 1125                               | 1122                                        | 1121                                         | 1123                                         | 1123                                         | 1123                                         |
| <i>-SO<sub>3</sub><sup>-</sup> asymmetric</i> | 1158                               | 1163                                        | 1163                                         | 1163                                         | 1163                                         | 1163                                         |
| <i>C - C</i>                                  | 1261                               | 1264                                        | 1262                                         | 1264                                         | 1264                                         | 1263                                         |
| <i>C = C</i>                                  | 1543                               | 1544                                        | 1544                                         | 1542                                         | 1542                                         | 1544                                         |

**Table S5.** Binding energy of S2p and O1s contribution for PEDOT and PSS.

|                                                 | S2p    |        | O1s    |        |
|-------------------------------------------------|--------|--------|--------|--------|
|                                                 | PEDOT  | PSS    | PEDOT  | PSS    |
| PEDOT:PSS                                       | 163.43 | 167.8  | 532.50 | 531.00 |
| PEDOT:PSS/H <sub>2</sub> SO <sub>4</sub> -130°C | 163.50 | 167.00 | 532.80 | 531.20 |
| PEDOT:PSS/H <sub>3</sub> PO <sub>4</sub> -160°C | 163.42 | 167.90 | 532.70 | 531.60 |
| PEDOT:PSS/HCl-130°C                             | 163.42 | 167.80 | 532.80 | 531.60 |
| PEDOT:PSS/HCOOH-160°C                           | 163.45 | 167.36 | 532.80 | 531.20 |

**Table S6.** XRD peak results for pristine PEDOT:PSS and acid post-treated samples.

| Index            | PEDOT:PSS |       | PEDOT:PSS/H <sub>2</sub> S O <sub>4</sub> - 130°C |       | PEDOT:PSS/H <sub>3</sub> P O <sub>4</sub> - 160°C |       | PEDOT:PSS/HCl - 130°C |       | PEDOT:PSS/HCOO H - 160°C |       | PEDOT:PSS/H <sub>2</sub> SO <sub>4</sub> - 130°C - 50 MPa |       |
|------------------|-----------|-------|---------------------------------------------------|-------|---------------------------------------------------|-------|-----------------------|-------|--------------------------|-------|-----------------------------------------------------------|-------|
|                  | 2θ        | d (Å) | 2θ                                                | d (Å) | 2θ                                                | d (Å) | 2θ                    | d (Å) | 2θ                       | d (Å) | 2θ                                                        | d (Å) |
| d <sub>100</sub> | 7.3       | 12.1  | 6.4                                               | 13.8  | 7.1                                               | 12.44 | 7.3                   | 12.1  | 7                        | 12.71 | 6.6                                                       | 13.38 |
| d <sub>200</sub> | -         | -     | 12.4                                              | 7.13  | 10.1                                              | 8.75  | 10.5                  | 8.42  | 11                       | 8.04  | 12.6                                                      | 7.02  |
| d <sub>001</sub> | 18.1      | 4.9   | 19.2                                              | 4.62  | 18.5                                              | 4.79  | 18.5                  | 4.79  | 18.7                     | 4.75  | 19.2                                                      | 4.62  |
| d <sub>010</sub> | 25.9      | 3.44  | 25.8                                              | 3.45  | 26.1                                              | 3.41  | 26.3                  | 3.39  | 25.9                     | 3.44  | 25.9                                                      | 3.44  |

**Table S7.** GIWAXS peak results for pristine PEDOT:PSS and acid post-treated samples along the out-of-plane direction.

| Index            | PEDOT:PSS           |       | PEDOT:PSS/H <sub>2</sub> S O <sub>4</sub> - 130°C |       | PEDOT:PSS/H <sub>3</sub> P O <sub>4</sub> - 160°C |       | PEDOT:PSS/HC 1- 130°C |       | PEDOT:PSS/HCO OH - 160°C |       | PEDOT:PSS/H <sub>2</sub> SO <sub>4</sub> - 130°C - 50 MPa |       |
|------------------|---------------------|-------|---------------------------------------------------|-------|---------------------------------------------------|-------|-----------------------|-------|--------------------------|-------|-----------------------------------------------------------|-------|
|                  | q(Å <sup>-1</sup> ) | d (Å) | q(Å <sup>-1</sup> )                               | d (Å) | q(Å <sup>-1</sup> )                               | d (Å) | q(Å <sup>-1</sup> )   | d (Å) | q(Å <sup>-1</sup> )      | d (Å) | q(Å <sup>-1</sup> )                                       | d (Å) |
| d <sub>100</sub> | 0.50                | 12.57 | 0.42                                              | 14.61 | 0.51                                              | 12.32 | 0.50                  | 12.57 | 0.52                     | 12.08 | 0.45                                                      | 13.65 |
| d <sub>200</sub> | -                   | -     | 0.85                                              | 7.39  | 0.73                                              | 8.61  | 0.74                  | 8.49  | 0.79                     | 8.05  | 0.87                                                      | 7.22  |
| d <sub>001</sub> | 1.29                | 4.91  | 1.32                                              | 4.76  | 1.27                                              | 4.95  | 1.30                  | 4.87  | 1.30                     | 4.83  | 1.32                                                      | 4.76  |

|           |      |      |      |      |      |      |      |      |      |      |      |      |
|-----------|------|------|------|------|------|------|------|------|------|------|------|------|
| $d_{010}$ | 1.84 | 3.41 | 1.83 | 3.43 | 1.83 | 3.43 | 1.84 | 3.41 | 1.84 | 3.39 | 1.83 | 3.43 |
|-----------|------|------|------|------|------|------|------|------|------|------|------|------|

**Table S8.** GIWAXS peak results for pristine PEDOT:PSS and acid post-treated samples along the in-plane direction.

| Index     | PEDOT:PSS            |                 | PEDOT:PSS/H <sub>2</sub> S<br>O <sub>4</sub> - 130°C |                 | PEDOT:PSS/H <sub>3</sub> P<br>O <sub>4</sub> - 160°C |                 | PEDOT:PSS/H<br>Cl - 130°C |                 | PEDOT:PSS/HCOO<br>H - 160°C |                 | PEDOT:PSS/H <sub>2</sub> SO <sub>4</sub> -<br>130°C - 50 MPa |                 |
|-----------|----------------------|-----------------|------------------------------------------------------|-----------------|------------------------------------------------------|-----------------|---------------------------|-----------------|-----------------------------|-----------------|--------------------------------------------------------------|-----------------|
|           | $q(\text{\AA}^{-1})$ | $d(\text{\AA})$ | $q(\text{\AA}^{-1})$                                 | $d(\text{\AA})$ | $q(\text{\AA}^{-1})$                                 | $d(\text{\AA})$ | $q(\text{\AA}^{-1})$      | $d(\text{\AA})$ | $q(\text{\AA}^{-1})$        | $d(\text{\AA})$ | $q(\text{\AA}^{-1})$                                         | $d(\text{\AA})$ |
| $d_{001}$ | 1.27                 | 4.95            | 1.20                                                 | 5.23            | 1.23                                                 | 5.12            | 1.24                      | 5.07            | 1.25                        | 5.03            | 1.22                                                         | 5.15            |
| $d_{010}$ | 1.82                 | 3.45            | 1.86                                                 | 3.38            | 1.83                                                 | 3.43            | 1.83                      | 3.41            | 1.86                        | 3.38            | 1.86                                                         | 3.38            |

**Table S9.** The tensile test results.

|                                                             | Tensile strength (MPa) | Young modulus (GPa) | Elongation (%) |
|-------------------------------------------------------------|------------------------|---------------------|----------------|
| PEDOT:PSS                                                   | 46.2                   | 4.8                 | 5.2            |
| PEDOT:PSS/H <sub>2</sub> SO <sub>4</sub> -<br>130°C         | 52.5                   | 8.8                 | 2.8            |
| PEDOT:PSS/H <sub>2</sub> SO <sub>4</sub> -<br>130°C - 50MPa | 42.0                   | 19.1                | 1.4            |

**Table S10.** A comparison of the shielding characteristic of developed micrometer-thick PEDOT:PSS shield with previous practices in the literature.

| Shield Composition                                                  | Thickness (mm) | Conductivity (S.cm <sup>-1</sup> ) | SE <sub>T</sub> (dB) | SEE/t (dB cm <sup>2</sup> g <sup>-1</sup> ) | Ref. |
|---------------------------------------------------------------------|----------------|------------------------------------|----------------------|---------------------------------------------|------|
| PEDOT:PSS-Ti <sub>3</sub> C <sub>2</sub> T <sub>x</sub>             | 0.011          | 340.5                              | 42.1                 | 19,498                                      | 3    |
| PEDOT:PSS-Ti <sub>3</sub> C <sub>2</sub> T <sub>x</sub>             | 0.007          | 2900±400                           | 55.42                | 38,079                                      | 4    |
| PEDOT:PSS-Graphene                                                  | 0.8            | 6.84                               | 70                   | 841                                         | 5    |
| CNF-Ti <sub>3</sub> C <sub>2</sub> T <sub>x</sub>                   | 0.035          | 1.43                               | 39.6                 | 7029                                        | 6    |
| PVA-Ti <sub>3</sub> C <sub>2</sub> T <sub>x</sub>                   | 0.1            | 2×10 <sup>-4</sup>                 | 26                   | 5136                                        | 7    |
| PVA-Ti <sub>3</sub> C <sub>2</sub> T <sub>x</sub>                   | 0.027          | 7.16                               | 44.4                 | 9343                                        | 8    |
| PAN-Ti <sub>3</sub> C <sub>2</sub> T <sub>x</sub> -TiO <sub>2</sub> | 0.045          | 92.68                              | 32                   | 4085                                        | 9    |
| ANF-Ti <sub>3</sub> C <sub>2</sub> T <sub>x</sub>                   | 0.012          | -                                  | 34.71                | 21,971                                      | 10   |
| CNF-Ti <sub>3</sub> C <sub>2</sub> T <sub>x</sub> -AgNW             | 0.035          | 373.78                             | 59.7                 | 10,647                                      | 11   |
| CNF-Ti <sub>3</sub> C <sub>2</sub> T <sub>x</sub>                   | 0.047          | 7.39                               | 24                   | 2647                                        | 12   |
| PANi-Ti <sub>3</sub> C <sub>2</sub> T <sub>x</sub>                  | 0.376          | 3.25                               | 35.3                 | 1700                                        | 13   |
| Xanthan-Ti <sub>3</sub> C <sub>2</sub> T <sub>x</sub>               | 0.00684        | 115.29                             | 34.1                 | 14,490                                      | 14   |
| Epoxy-Ti <sub>3</sub> C <sub>2</sub> T <sub>x</sub> -rGO            | 2              | 6.95                               | 56.4                 | 9400                                        | 15   |
| POM-MWCNT                                                           | 2              | 3.33                               | 58.6                 | 344.4                                       | 16   |
| PC-MWCNT                                                            | 2.16           | 3                                  | 39                   | 164                                         | 17   |
| PVDF-MWCNT                                                          | 0.9            | 0.074                              | 32                   | 259                                         | 18   |
| PS-Graphene                                                         | 2.5            | 1.25                               | 29                   | 322                                         | 19   |
| PHBV-AgNW                                                           | 0.018          | -                                  | 45.9                 | 19,678                                      | 20   |
| PMMA-Graphene                                                       | 0.24           | 3.11                               | 19                   | 1042                                        | 21   |
| Neat Ti <sub>3</sub> C <sub>2</sub> T <sub>x</sub>                  | 0.014          | -                                  | 38.33                | 42932                                       | 2    |

|                                                               |        |      |       |           |              |
|---------------------------------------------------------------|--------|------|-------|-----------|--------------|
| 80 wt% Ti <sub>3</sub> C <sub>2</sub> T <sub>x</sub>          | 0.021  | -    | 28.06 | 32240     | <sup>2</sup> |
| 50 wt% Ti <sub>3</sub> C <sub>2</sub> T <sub>x</sub>          | 0.024  | -    | 16.26 | 20246     | <sup>2</sup> |
| H <sub>2</sub> SO <sub>4</sub> -treated hot-pressed PEDOT:PSS | 0.0046 | 3360 | 51.79 | 75,057.97 | This work    |

**Abbreviations:** Poly(3,4-ethylenedioxythiophene):polystyrene sulfonate (PEDOT:PSS), cellulose nanofiber (CNF), polyvinyl alcohol (PVA), polyacrylonitrile (PAN), Aramid nanofiber (ANF), nanocellulose (NC), polyaniline (PANi), reduced graphene oxide (rGO), Poly(oxymethylene) (POM), multi-walled carbon nanotube (MWCNT), polycarbonate (PC), polyvinylidene fluoride (PVDF), polystyrene (PS), poly(3-hydrobutyrate-co-3-hydroxyvalerate) (PHBV), silver nanowire (AgNW), polymethyl methacrylate (PMMA).

## Reference

1. J. Dong and G. Portale, *Advanced Materials Interfaces*, 2020, **7**, 2000641.
2. A. Ghaffarkhah, M. Kamkar, Z. A. Dijvejin, H. Riazi, S. Ghaderi, K. Golovin, M. Soroush and M. Arjmand, *Carbon*, 2022, **191**, 277-289.
3. R. Liu, M. Miao, Y. Li, J. Zhang, S. Cao and X. Feng, *ACS Applied Materials & Interfaces*, 2018, **10**, 44787-44795.
4. A. Ghaffarkhah, M. Kamkar, H. Riazi, E. Hosseini, Z. A. Dijvejin, K. Golovin, M. Soroush and M. Arjmand, *New Journal of Chemistry*, 2021, **45**, 20787-20799.
5. N. Agnihotri, K. Chakrabarti and A. De, *RSC Advances*, 2015, **5**, 43765-43771.
6. B. Zhou, Z. Zhang, Y. Li, G. Han, Y. Feng, B. Wang, D. Zhang, J. Ma and C. Liu, *ACS Applied Materials & Interfaces*, 2020, **12**, 4895-4905.
7. H. Xu, X. Yin, X. Li, M. Li, S. Liang, L. Zhang and L. Cheng, *ACS Applied Materials & Interfaces*, 2019, **11**, 10198-10207.
8. X. Jin, J. Wang, L. Dai, X. Liu, L. Li, Y. Yang, Y. Cao, W. Wang, H. Wu and S. Guo, *Chemical Engineering Journal*, 2020, **380**, 122475.
9. Y. Wang, H.-K. Peng, T.-T. Li, B.-C. Shiu, H.-T. Ren, X. Zhang, C.-W. Lou and J.-H. Lin, *Chemical Engineering Journal*, 2021, **412**, 128681.
10. H. Wei, M. Wang, W. Zheng, Z. Jiang and Y. Huang, *Ceramics International*, 2020, **46**, 6199-6204.
11. B. Zhou, Q. Li, P. Xu, Y. Feng, J. Ma, C. Liu and C. Shen, *Nanoscale*, 2021, **13**, 2378-2388.
12. W.-T. Cao, F.-F. Chen, Y.-J. Zhu, Y.-G. Zhang, Y.-Y. Jiang, M.-G. Ma and F. Chen, *ACS Nano*, 2018, **12**, 4583-4593.

13. G. Yin, Y. Wang, W. Wang, Z. Qu and D. Yu, *Advanced Materials Interfaces*, 2021, **8**, 2001893.
14. Y. Sun, R. Ding, S. Y. Hong, J. Lee, Y.-K. Seo, J.-D. Nam and J. Suhr, *Chemical Engineering Journal*, 2021, **410**, 128348.
15. D. Liu, H.-J. Li, J. Gao, S. Zhao, Y. Zhu, P. Wang, D. Wang, A. Chen, X. Wang and J. Yang, *Nanoscale Research Letters*, 2018, **13**, 261.
16. J. Li, J.-L. Chen, X.-H. Tang, J.-H. Cai, J.-H. Liu and M. Wang, *Journal of Colloid and Interface Science*, 2020, **565**, 536-545.
17. S. Pande, A. Chaudhary, D. Patel, B. P. Singh and R. B. Mathur, *RSC Advances*, 2014, **4**, 13839-13849.
18. B. Bhaskara Rao, N. Kale, B. Kothavale and S. Kale, *AIP Advances*, 2016, **6**, 065107.
19. D.-X. Yan, P.-G. Ren, H. Pang, Q. Fu, M.-B. Yang and Z.-M. Li, *Journal of Materials Chemistry*, 2012, **22**, 18772-18774.
20. S. Yang, Y.-Y. Wang, Y.-N. Song, L.-C. Jia, G.-J. Zhong, L. Xu, D.-X. Yan, J. Lei and Z.-M. Li, *Journal of Materials Chemistry C*, 2021, **9**, 3307-3315.
21. H.-B. Zhang, Q. Yan, W.-G. Zheng, Z. He and Z.-Z. Yu, *ACS Applied Materials & Interfaces*, 2011, **3**, 918-924.
